# Supplementary material for: Effects of the Ethanol Extract of Dipterocarpus alatus Leaf on the Unpredictable Chronic Mild Stress-Induced Depression in ICR Mice and Its Possible Mechanism of Action
Source: MDPI journal article supplement (doi:10.3390/molecules24183396), 2019-09-18
Supplement: s1 [file s1]

## Supplementary Materials

### Effects of the Ethanol Extract of *Dipterocarpus alatus* Leaf on the Unpredictable Chronic Mild Stress-Induced Depression in ICR Mice and Its Possible Mechanism of Action

Supawadee Daodee<sup>1</sup>, Orawan Monthakantirat<sup>1</sup>, Kanlaya Ruengwinitwong<sup>1</sup>, Kankrittanon Gatenakorn<sup>1</sup>, Juthamart Maneenet<sup>1</sup>, Charinya Khamphukdee<sup>1</sup>, Nazim Sekeroglu<sup>2</sup>, Yaowared Chulikhit<sup>1\*</sup> and Anake Kijjoa<sup>3\*</sup>

<sup>1</sup>Division of Pharmaceutical Chemistry, Faculty of Pharmaceutical Sciences, Khon Kaen University, Khon Kaen 40002, Thailand. E-mail: csupawad@kku.ac.th (S.D.); oramon@kku.ac.th (O.M.); k.ruengt@gmail.com (K.R.); kankrittanon@gmail.com (K.G.); juthamart\_pp@hotmail.com (J.M.); charkh@kku.ac.th (C.K.); yaosum@kku.ac.th (Y.Ch.).

<sup>2</sup>Department of Horticulture, Faculty of Agriculture, Killis 7 Aralik University, Killis 79000, Turkey. E-mail: nsekeroglu@gmail.com.

<sup>3</sup>ICBAS-Instituto de Ciências Biomédicas Abel Salazar and CIIMAR, Rua de Jorge Viterbo Ferreira, 228, 4050-313 Porto, Portugal. E-mail: ankijjoa@icbas.up.pt.

\*To whom correspondence should be addressed, E-mail: yaosum@kku.ac.th (Y.Ch.) and ankijjoa@icbas.up.pt (A.K.), Tel.: +351-220428331 (A.K.)

**Table S1.** One-way analysis of variance (ANOVA) test of sucrose preference test.

| Group comparison                                | ANOVA. followed by Tukey's post hoc test |                                                                  |
|-------------------------------------------------|------------------------------------------|------------------------------------------------------------------|
|                                                 | <i>P</i>                                 | <i>F</i> (DF <sub>between group</sub> , DF <sub>residual</sub> ) |
| All group                                       | <0.001                                   | <i>F</i> (4,40) =13.218                                          |
| Non-stress group VS. vehicle-treated UCMS group | <0.001                                   |                                                                  |
| Vehicle-treated UCMS group VS. UCMS+IMP         | 0.0019                                   |                                                                  |
| Vehicle-treated UCMS group VS. UCMS+LE100       | 0.001                                    |                                                                  |
| Vehicle-treated UCMS group VS. UCMS+LE500       | <0.001                                   |                                                                  |

**Table S2.** One-way analysis of variance (ANOVA) test of FST.

| Group comparison                                | ANOVA followed by Tukey's post hoc test |                                                                  |
|-------------------------------------------------|-----------------------------------------|------------------------------------------------------------------|
|                                                 | <i>P</i>                                | <i>F</i> (DF <sub>between group</sub> , DF <sub>residual</sub> ) |
| All group                                       | <0.001                                  | <i>F</i> (4,44) =27.974                                          |
| Non-stress group VS. vehicle-treated UCMS group | <0.001                                  |                                                                  |
| Vehicle-treated UCMS group VS. UCMS+IMP         | <0.001                                  |                                                                  |
| Vehicle-treated UCMS group VS. UCMS+LE100       | <0.001                                  |                                                                  |
| Vehicle-treated UCMS group VS. UCMS+LE500       | <0.001                                  |                                                                  |
| UCMS+LE 100 VS. UCMS+LE 500                     | 0.0012                                  |                                                                  |

**Table S3.** One-way analysis of variance (ANOVA) test of TST.

| Group comparison                                | ANOVA followed by Tukey's post hoc test |                                                                  |
|-------------------------------------------------|-----------------------------------------|------------------------------------------------------------------|
|                                                 | <i>P</i>                                | <i>F</i> (DF <sub>between group</sub> , DF <sub>residual</sub> ) |
| All group                                       | <0.001                                  | <i>F</i> (4,45) =15.423                                          |
| Non-stress group VS. vehicle-treated UCMS group | <0.001                                  |                                                                  |
| Vehicle-treated UCMS group VS. UCMS+IMP         | <0.001                                  |                                                                  |
| Vehicle-treated UCMS group VS. UCMS+LE100       | <0.001                                  |                                                                  |
| Vehicle-treated UCMS group VS. UCMS+LE500       | <0.001                                  |                                                                  |

**Table S4.** One-way analysis of variance (ANOVA) test of serum corticosterone (CORT) levels.

| Group comparison                                | ANOVA followed by Tukey's post hoc test |                                                                  |
|-------------------------------------------------|-----------------------------------------|------------------------------------------------------------------|
|                                                 | <i>P</i>                                | <i>F</i> (DF <sub>between group</sub> , DF <sub>residual</sub> ) |
| All group                                       | <0.001                                  | <i>F</i> (4,16) =8.092                                           |
| Non-stress group VS. vehicle-treated UCMS group | <0.001                                  |                                                                  |
| Vehicle-treated UCMS group VS. UCMS+IMP         | 0.036                                   |                                                                  |
| Vehicle-treated UCMS group VS. UCMS+LE100       | 0.564                                   |                                                                  |
| Vehicle-treated UCMS group VS. UCMS+LE500       | 0.001                                   |                                                                  |

**Table S5.** One-way analysis of variance (ANOVA) test of SGK1 mRNA expression (Frontal cortex).

| Group comparison                                | ANOVA followed by Tukey's post hoc test |                                                                  |
|-------------------------------------------------|-----------------------------------------|------------------------------------------------------------------|
|                                                 | <i>P</i>                                | <i>F</i> (DF <sub>between group</sub> , DF <sub>residual</sub> ) |
| All group                                       | 0.022                                   | <i>F</i> (2,6) =7.22                                             |
| Non-stress group VS. vehicle-treated UCMS group | 0.005                                   |                                                                  |
| Vehicle-treated UCMS group VS. UCMS+IMP         | 0.017                                   |                                                                  |
| Vehicle-treated UCMS group VS. UCMS+LE100       | 0.017                                   |                                                                  |
| Vehicle-treated UCMS group VS. UCMS+LE500       | 0.017                                   |                                                                  |

**Table S6.** One-way analysis of variance (ANOVA) test of SGK1 mRNA expression (Hippocampus).

| Group comparison                                | ANOVA followed by Tukey's post hoc test |                                                                  |
|-------------------------------------------------|-----------------------------------------|------------------------------------------------------------------|
|                                                 | <i>P</i>                                | <i>F</i> (DF <sub>between group</sub> , DF <sub>residual</sub> ) |
| All group                                       | <0.001                                  | <i>F</i> (4,16) = 67.663                                         |
| Non-stress group VS. vehicle-treated UCMS group | <0.001                                  |                                                                  |
| Vehicle-treated UCMS group VS. UCMS+IMP         | <0.001                                  |                                                                  |
| Vehicle-treated UCMS group VS. UCMS+LE100       | <0.001                                  |                                                                  |
| Vehicle-treated UCMS group VS. UCMS+LE500       | <0.001                                  |                                                                  |
| UCMS+LE 100 VS. UCMS+LE 500                     | 0.016                                   |                                                                  |

**Table S7.** One-way analysis of variance (ANOVA) test of BDNF mRNA expression (Frontal cortex).

| Group comparison                                | ANOVA followed by Tukey's post hoc test |                                                                  |
|-------------------------------------------------|-----------------------------------------|------------------------------------------------------------------|
|                                                 | <i>P</i>                                | <i>F</i> (DF <sub>between group</sub> , DF <sub>residual</sub> ) |
| All group                                       | <0.001                                  | <i>F</i> (4,10) =13.705                                          |
| Non-stress group VS. vehicle-treated UCMS group | <0.001                                  |                                                                  |
| Vehicle-treated UCMS group VS. UCMS+IMP         | <0.001                                  |                                                                  |
| Vehicle-treated UCMS group VS. UCMS+LE500       | <0.001                                  |                                                                  |
| UCMS+LE 100 VS. UCMS+LE 500                     | 0.016                                   |                                                                  |

**Table S8.** One-way analysis of variance (ANOVA) test of BDNF mRNA expression (Hippocampus).

| Group comparison                                | ANOVA followed by Tukey's post hoc test |                                                                  |
|-------------------------------------------------|-----------------------------------------|------------------------------------------------------------------|
|                                                 | <i>P</i>                                | <i>F</i> (DF <sub>between group</sub> , DF <sub>residual</sub> ) |
| All group                                       | 0.006                                   | <i>F</i> (4,12)=11.526                                           |
| non-stress group VS. vehicle-treated UCMS group | 0.006                                   |                                                                  |
| vehicle-treated UCMS group VS. UCMS+IMP         | <0.001                                  |                                                                  |
| vehicle-treated UCMS group VS. UCMS+LE500       | 0.049                                   |                                                                  |
| UCMS+LE 100 VS. UCMS+LE 500                     | 0.016                                   |                                                                  |

**Figure S1.** HPLC chromatograms of six standards' solution (A) and *D. alatus* leaf extract (B) (1 = Gallic acid, 2 = Caffeic acid, 3 = Ferulic acid, 4 = Luteolin-7-*O*-glucoside, 5 = Rutin, 6 = Kaempferol-3-glucoside).

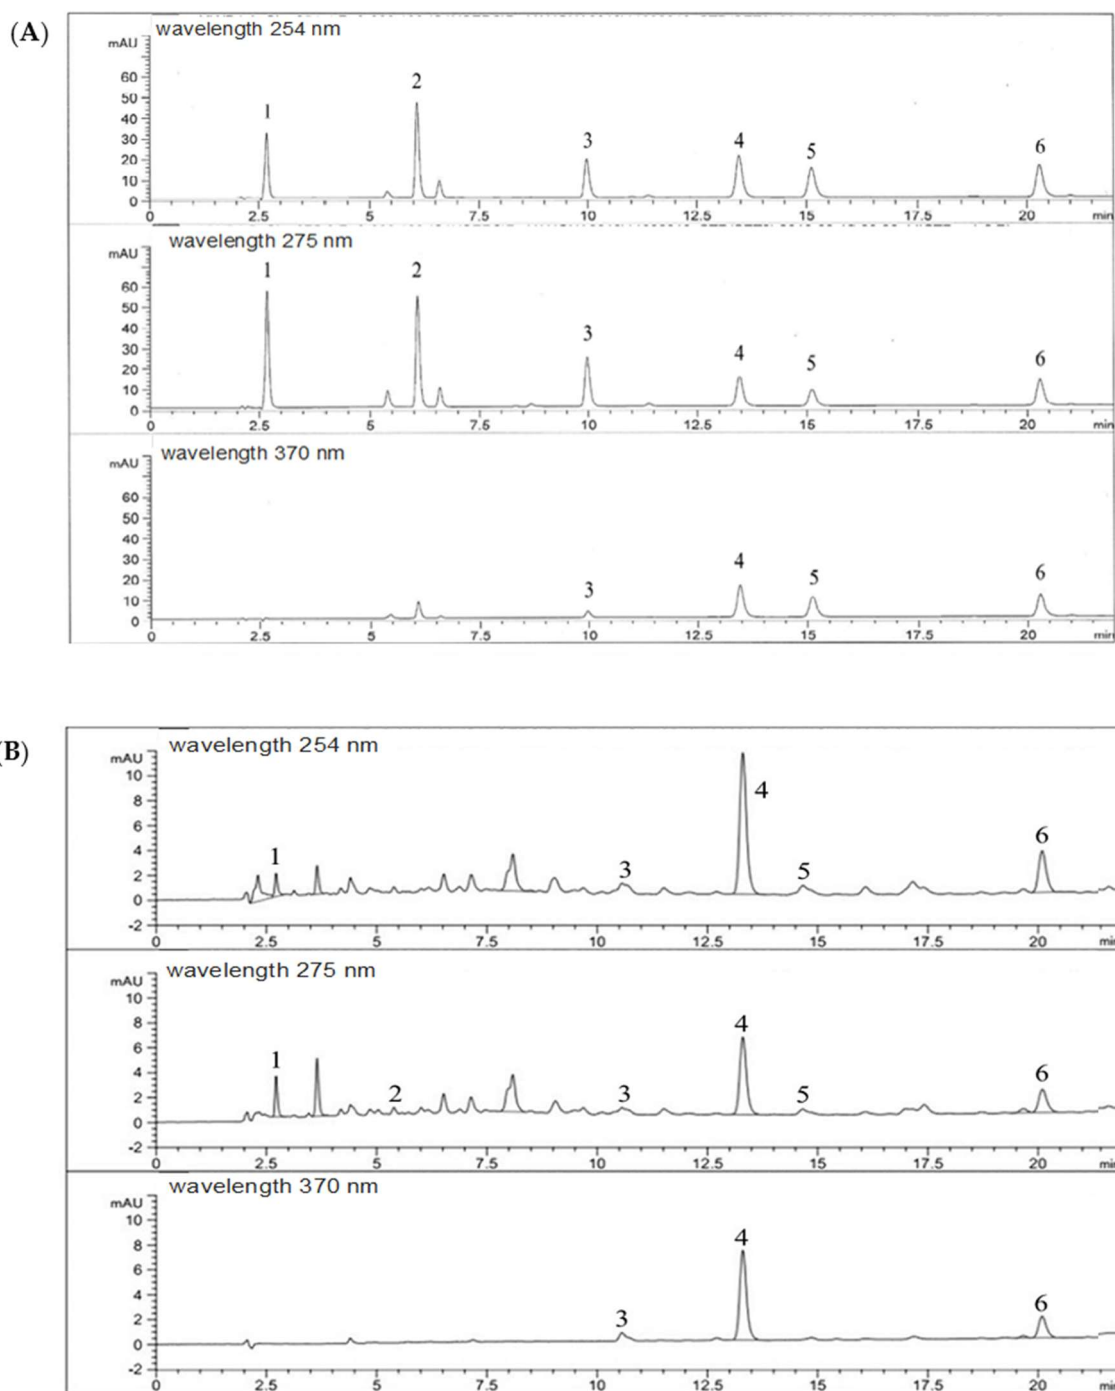

**Table S9.** Validation results of the analytical method for determination of flavonoids and phenolic acids.

| Parameter           |                                             | Compounds                  |                            |                            |                            |                            |                            |
|---------------------|---------------------------------------------|----------------------------|----------------------------|----------------------------|----------------------------|----------------------------|----------------------------|
|                     |                                             | Gallic acid                | Caffeic acid               | Ferulic acid               | Luteolin-7-O-glucoside     | Rutin                      | Kaempferol-3-glucoside     |
| Linearity           | Range (µg/mL)                               | 1-6                        | 1-6                        | 1-6                        | 1-6                        | 1-6                        | 1-6                        |
|                     | Coefficient Determination (R <sup>2</sup> ) | 0.9987±0.0012              | 0.9949±0.0031              | 0.9984±0.0013              | 0.9988±0.0014              | 0.9951±0.0023              | 0.9938±0.0051              |
| LOD (µg/mL)         |                                             | 0.5<br>(S/N~<br>4.04±0.71) | 0.5<br>(S/N~<br>3.88±0.90) | 0.5<br>(S/N~<br>3.21±0.71) | 0.5<br>(S/N~<br>4.28±0.43) | 0.5<br>(S/N~<br>4.03±0.35) | 0.5<br>(S/N~<br>3.81±0.28) |
| LOQ (µg/mL)         |                                             | 1<br>(S/N~<br>11.15±1.32)  | 1<br>(S/N~<br>12.26±1.37)  | 1<br>(S/N~<br>11.05±1.74)  | 1<br>(S/N~<br>12.85±1.30)  | 1<br>(S/N~<br>12.09±1.04)  | 1<br>(S/N~<br>11.44±0.83)  |
| Precision (%RSD)    | Within day                                  | 0.15-0.38                  | 1.33-2.99                  | 0.42-1.39                  | 0.60-1.99                  | 0.01-1.40                  | 0.62-3.76                  |
|                     | Between day                                 | 2.84-5.77                  | 1.43-5.34                  | 1.23-3.46                  | 0.75-5.76                  | 1.79-6.73                  | 0.30-4.89                  |
| Accuracy % Recovery | Conc. 1 µg/mL                               | 100.29±1.66                | 100.49±3.95                | 99.73±0.81                 | 100.23±6.29                | 109.54±2.78                | 104.83±3.58                |
|                     | Conc. 3 µg/mL                               | 100.60±3.54                | 99.05±3.98                 | 98.78±3.53                 | 100.43±4.89                | 96.34±3.21                 | 94.15±4.930                |
|                     | Conc. 6 µg/mL                               | 99.92±0.93                 | 97.67±1.63                 | 100.73±2.03                | 99.32±1.88                 | 102.05±1.79                | 104.73±2.94                |
